# Supplementary material
Source: PubMed Central journal article supplement (PMC8250762)
Supplement: DOM-23-1701-s001.pdf [file DOM-23-1701-s001.pdf]

# **Supplementary Materials**

**The J-shaped relationship between body mass index and mortality in patients with COVID-19:**

**A dose-response meta-analysis**

**Supplemental Table S1.** Quality assessment of the included cohort studies using the Newcastle–Ottawa Scale

| Author and year    | Selection                            |                                 |                           |                                                                   | Comparability        |                            | Outcome               |                  |                        | Total Quality Score |
|--------------------|--------------------------------------|---------------------------------|---------------------------|-------------------------------------------------------------------|----------------------|----------------------------|-----------------------|------------------|------------------------|---------------------|
|                    | Representativeness of exposed cohort | Selection of non-exposed cohort | Ascertainment of exposure | The outcome of interest was not present at the start of the study | Adjusted for age/sex | Adjusted for comorbidities | Assessment of outcome | Follow-up length | Loss to follow-up rate |                     |
| Anderson 2020      | 1                                    | 1                               | 1                         | 1                                                                 | 1                    | 1                          | 1                     | 1                | 1                      | 9                   |
| Baronia 2020       | 1                                    | 1                               | 1                         | 1                                                                 | 1                    | 1                          | 1                     | 1                | 1                      | 9                   |
| Czernichow 2020    | 1                                    | 1                               | 0                         | 1                                                                 | 1                    | 1                          | 1                     | 1                | 1                      | 8                   |
| Eastment 2020      | 1                                    | 1                               | 1                         | 1                                                                 | 1                    | 1                          | 1                     | 1                | 1                      | 9                   |
| Fai2r 2020         | 1                                    | 1                               | 1                         | 1                                                                 | 1                    | 1                          | 1                     | 1                | 1                      | 9                   |
| Goyal 2020         | 1                                    | 1                               | 1                         | 1                                                                 | 1                    | 1                          | 1                     | 1                | 1                      | 9                   |
| Gu 2020            | 1                                    | 1                               | 1                         | 1                                                                 | 1                    | 1                          | 1                     | 1                | 1                      | 9                   |
| Gupta 2020         | 1                                    | 1                               | 1                         | 1                                                                 | 1                    | 1                          | 1                     | 1                | 1                      | 9                   |
| Hajifathalian 2020 | 1                                    | 1                               | 1                         | 1                                                                 | 0                    | 1                          | 1                     | 1                | 1                      | 8                   |
| Halasz 2020        | 1                                    | 1                               | 1                         | 1                                                                 | 1                    | 1                          | 1                     | 1                | 1                      | 9                   |
| Hendren 2021       | 1                                    | 1                               | 1                         | 1                                                                 | 1                    | 1                          | 1                     | 1                | 1                      | 9                   |
| Iannelli 2020      | 1                                    | 1                               | 1                         | 1                                                                 | 1                    | 1                          | 1                     | 1                | 1                      | 9                   |
| Ioannou 2020       | 1                                    | 1                               | 1                         | 1                                                                 | 1                    | 1                          | 1                     | 1                | 1                      | 9                   |
| Kabarriti 2020     | 1                                    | 1                               | 1                         | 1                                                                 | 1                    | 1                          | 1                     | 1                | 1                      | 9                   |
| Kim 2020           | 1                                    | 1                               | 1                         | 1                                                                 | 1                    | 1                          | 1                     | 1                | 1                      | 9                   |
| Kim 2021           | 1                                    | 1                               | 1                         | 1                                                                 | 1                    | 1                          | 1                     | 1                | 1                      | 9                   |
| Klang 2020         | 1                                    | 1                               | 1                         | 1                                                                 | 1                    | 1                          | 1                     | 1                | 1                      | 9                   |
| Nakeshbandi 2020   | 1                                    | 1                               | 1                         | 1                                                                 | 1                    | 1                          | 1                     | 1                | 1                      | 9                   |
| Nimkar 2020        | 1                                    | 1                               | 1                         | 1                                                                 | 1                    | 1                          | 1                     | 1                | 1                      | 9                   |

|                             |   |   |   |   |   |   |   |   |   |   |
|-----------------------------|---|---|---|---|---|---|---|---|---|---|
| <b>Olivas-Martínez 2021</b> | 1 | 1 | 1 | 1 | 1 | 1 | 1 | 1 | 1 | 9 |
| <b>Palaiodimos 2020</b>     | 1 | 1 | 1 | 1 | 1 | 1 | 1 | 1 | 1 | 9 |
| <b>Petrilli 2020</b>        | 1 | 1 | 1 | 1 | 1 | 1 | 1 | 1 | 1 | 9 |
| <b>Rottoli 2020</b>         | 1 | 1 | 1 | 1 | 1 | 1 | 1 | 1 | 1 | 9 |
| <b>Schmidt 2021</b>         | 1 | 1 | 1 | 1 | 1 | 1 | 1 | 1 | 1 | 9 |
| <b>Shah 2020</b>            | 1 | 1 | 1 | 1 | 1 | 1 | 1 | 1 | 1 | 9 |
| <b>Smati 2021</b>           | 1 | 1 | 1 | 1 | 1 | 1 | 1 | 1 | 1 | 9 |
| <b>Tartof 2020</b>          | 1 | 1 | 1 | 1 | 1 | 1 | 1 | 1 | 1 | 9 |
| <b>Yoshida 2021</b>         | 1 | 1 | 1 | 1 | 1 | 1 | 1 | 1 | 1 | 9 |

Selection:

- 1) Representativeness of exposed cohort: 1, truly or somewhat representative of a community/population-based study; 0, selected group of users or lack of description of the derivation of the cohort.
- 2) Selection of non-exposed cohort: 1, drawn from the same community as the exposed cohort; 0, drawn from a different source or lack of description of the derivation of the non-exposed cohort.
- 3) Ascertainment of exposure: 1, validation of BMI with secure record or structured interview; 0, written self-report or lack of description of validation of BMI.
- 4) Demonstration that outcome of interest was not present at start of study: 1, yes; 0, no.

Comparability:

- 1) Study adjusted for age and sex: 1, yes; 0, no
- 2) Study adjusted for any comorbidities: 1, yes; 0, no.

Outcome:

- 1) Assessment of outcome: 1, independent blind assessment, confirmed by medical records or record linkage; 0, self-reported or no description.
- 2) Was follow-up long enough for outcomes to occur: 1, duration of follow-up at least 7 days or until discharges; 0, duration of follow-up < 7 days.
- 3) Loss to follow-up rate: 1, complete follow-up or loss to follow-up rate less than 20%; 0, loss to follow-up rate more than 20% or no statement.

**Supplemental Figure S1: PRISMA flow diagram of the literature search and article selection**

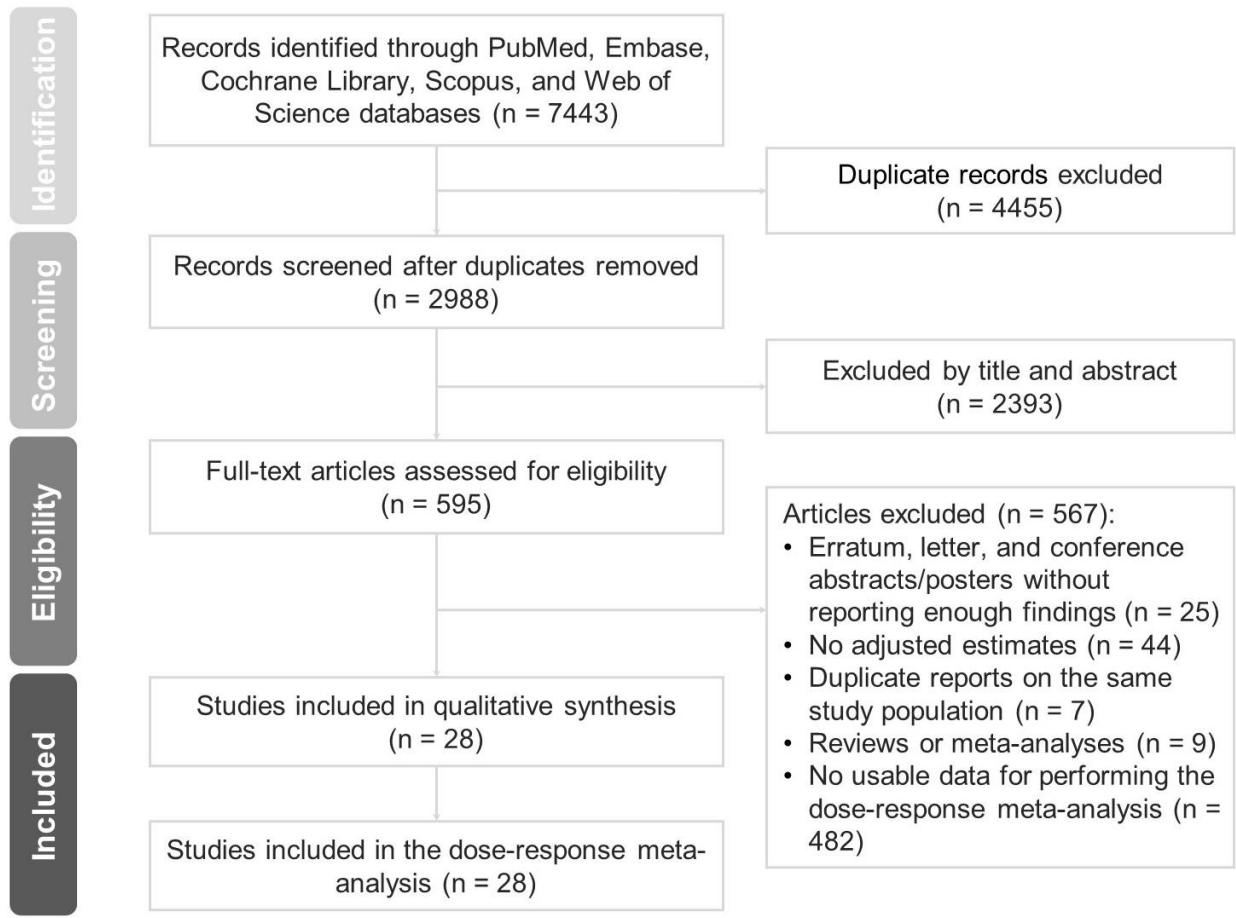

**Supplemental Figure S2:** Forest plot of the relative risk of mortality for highest versus lowest categories of body mass index in COVID-19 patients

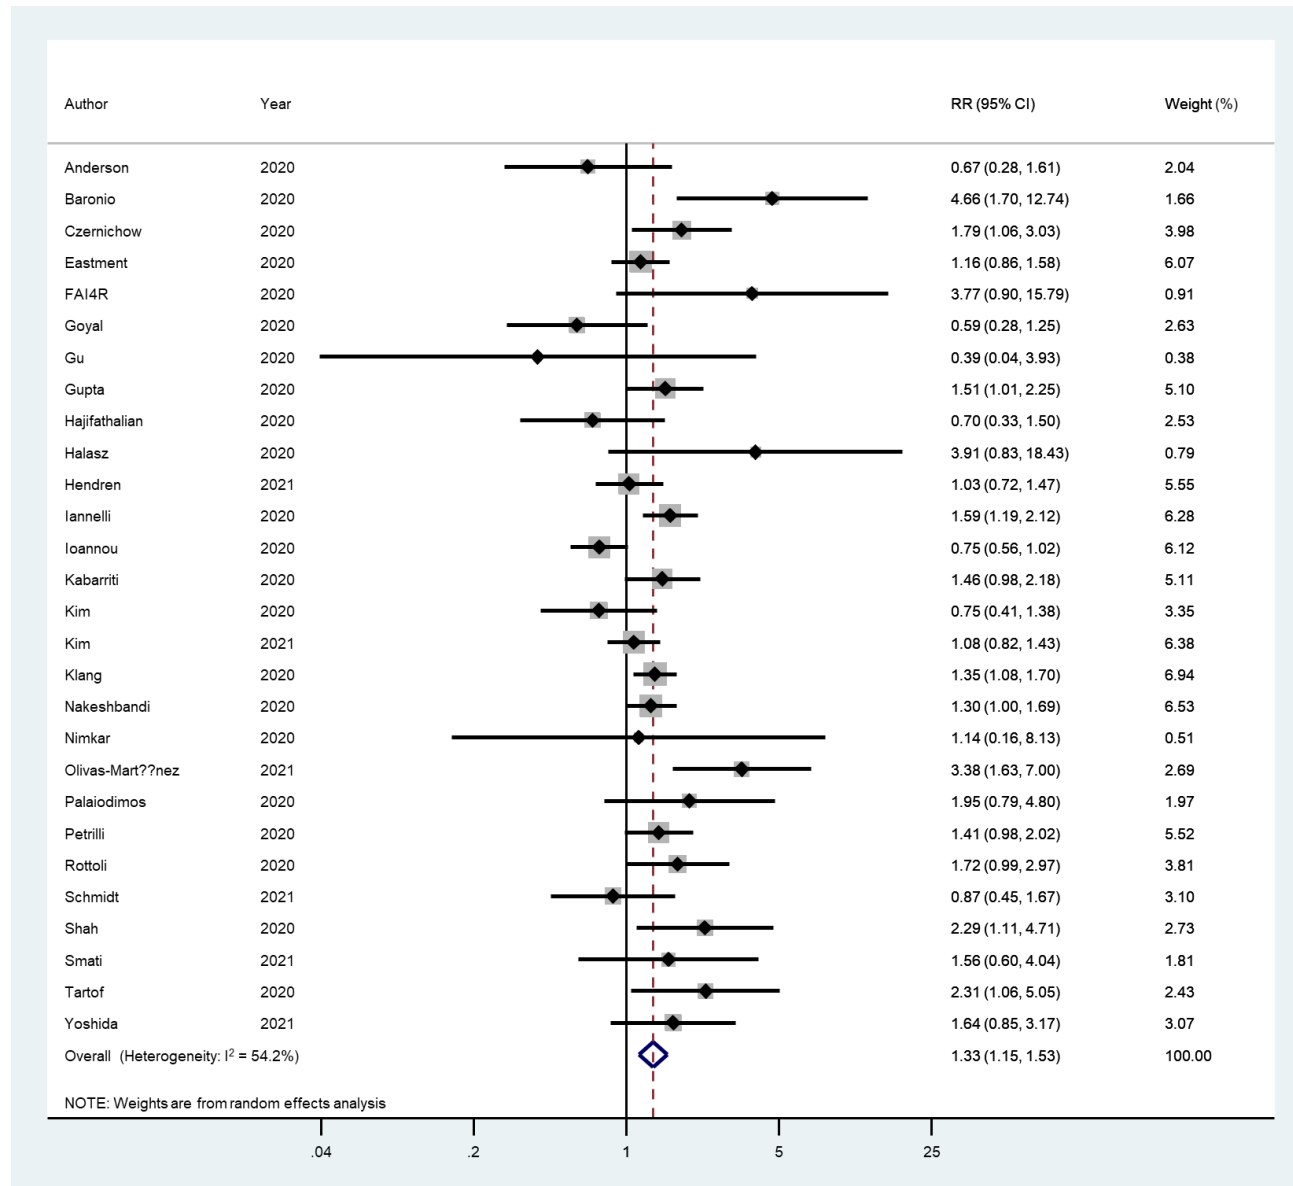

**Supplemental Figure S3.** Funnel plot to assess publication bias in studies comparing mortality between highest versus lowest categories of body mass index in COVID-19 patients

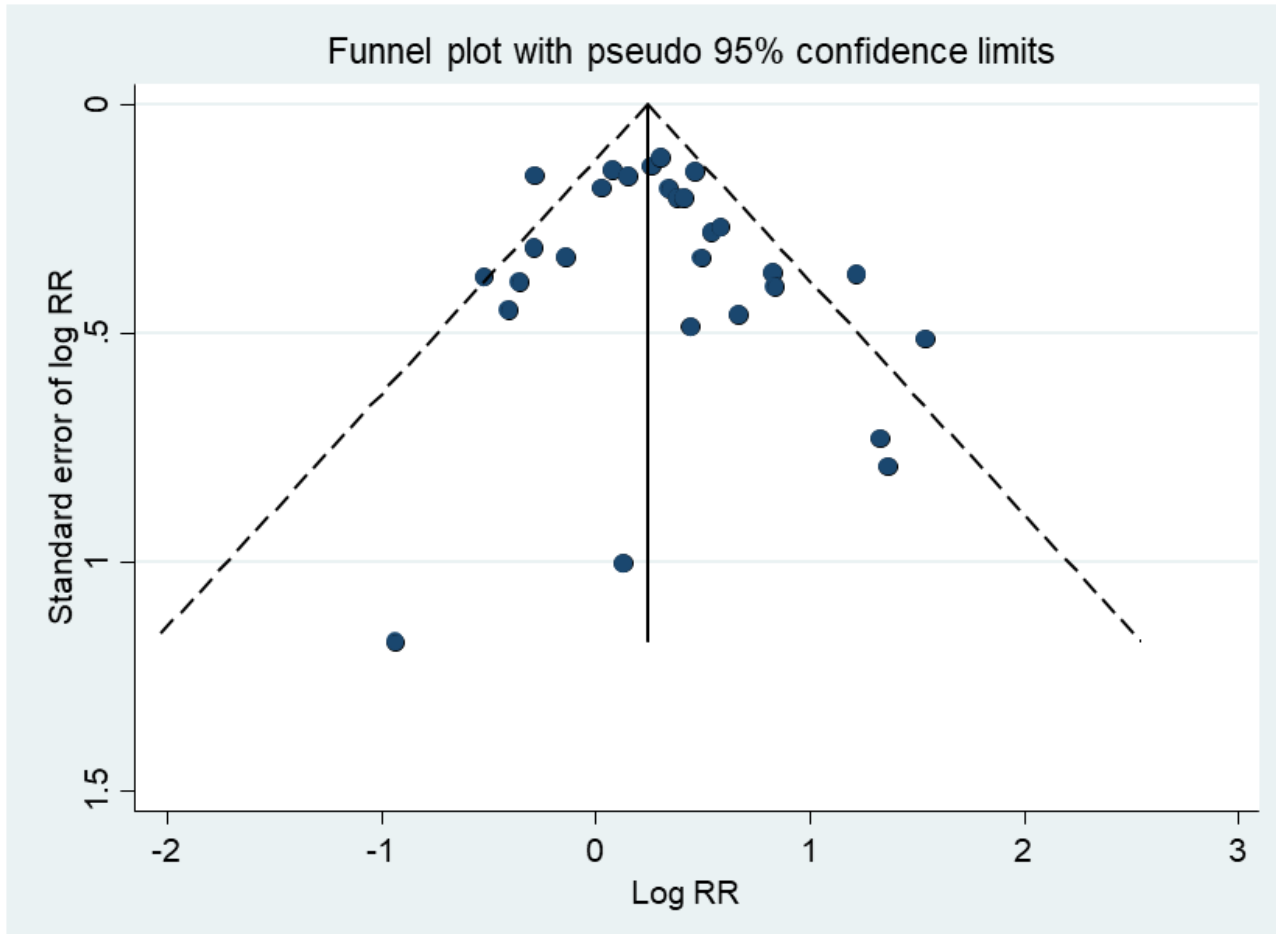

**Supplemental Figure S4.** The leave-one-out sensitivity analysis of the relative risk of mortality for highest versus lowest categories of body mass index in COVID-19 patients with each study omitted individually one at a time

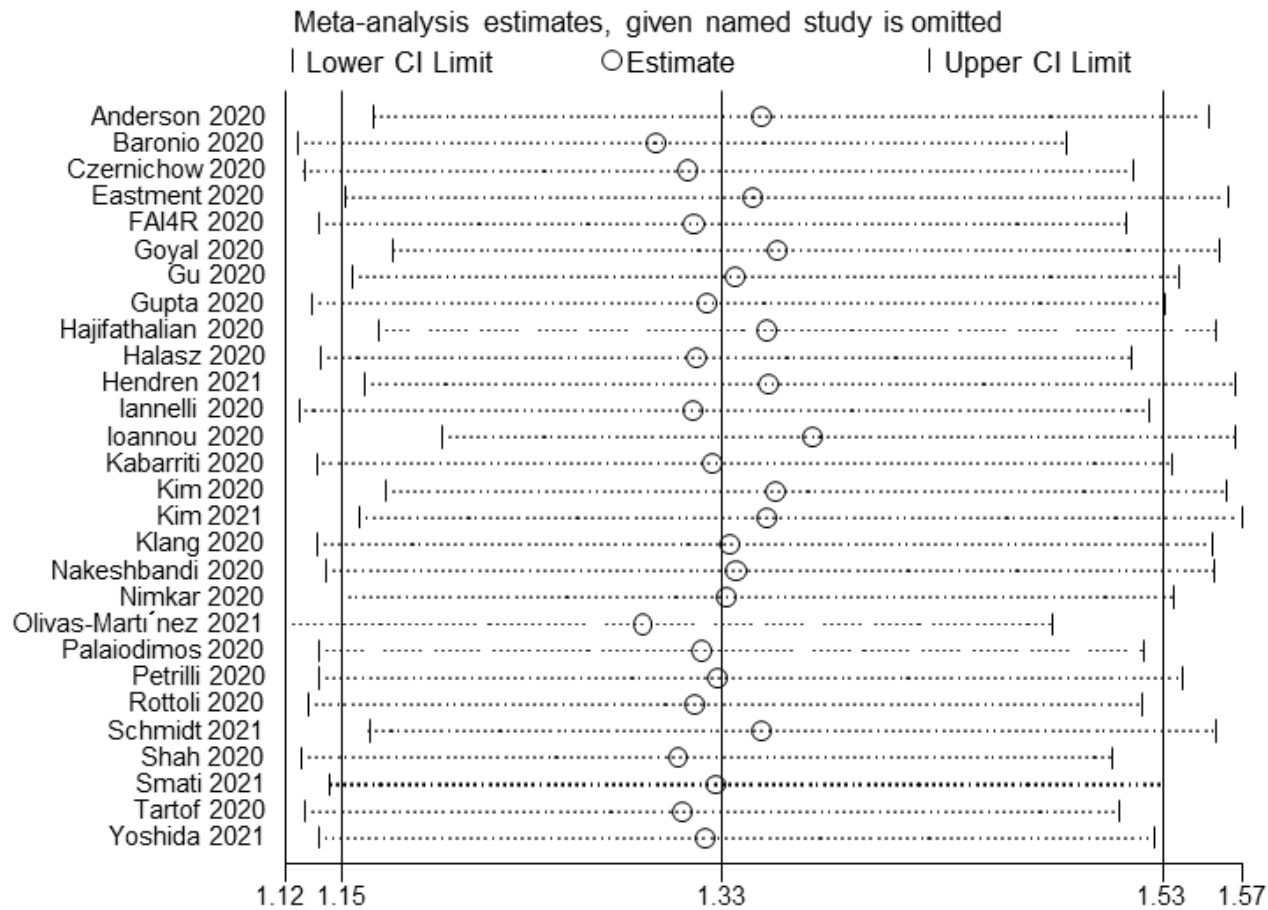

## Detailed Search Strategies

### PubMed:

("COVID-19"[tw] OR "COVID 19"[tw] OR "COVID19"[tw] OR "COVID2019"[tw] OR "COVID 2019"[tw] OR "COVID-2019"[tw] OR "novel coronavirus"[tw] OR "new coronavirus"[tw] OR "novel corona virus"[tw] OR "new corona virus"[tw] OR "SARS-CoV-2"[tw] OR "SARSCoV2"[tw] OR "SARS-CoV2"[tw] OR "2019nCoV"[tw] OR "2019-nCoV"[tw] OR "2019 coronavirus"[tw] OR "2019 corona virus"[tw] OR "coronavirus disease 2019"[tw] OR "severe acute respiratory syndrome coronavirus 2"[nm] OR "severe acute respiratory syndrome coronavirus 2"[tw] OR "sars-coronavirus-2"[tw] OR "coronavirus disease 2019"[tw] OR "corona virus disease 2019"[tw] OR "betacoronavirus" [tw] OR "beta-coronavirus" [tw])

AND

("Thinness"[Mesh] OR obesity[mh] OR overweight[mh] OR weight gain[mh] OR weight loss[mh] OR body mass index[mh] OR waist-hip ratio[mh] OR overweight\*[tw] OR over weight\*[tw] OR obes\* OR "body mass index" OR waist-hip ratio\* OR "abdominal fat" OR underweight [tw] OR "body weight" [tw])

AND

("mortality"[mh] OR "mortality" OR "fatal outcome"[mh] OR "fatal" OR "fatality" OR "fatalities" OR "death" OR "deaths")

Limit: English

### Embase:

('covid-19'/exp OR 'covid-19' OR 'covid 19'/exp OR 'covid 19' OR 'covid19' OR 'covid2019' OR 'covid 2019'/exp OR 'covid 2019' OR 'covid-2019'/exp OR 'covid-2019' OR 'novel coronavirus' OR 'new coronavirus' OR 'novel corona virus' OR 'new corona virus' OR 'sars-cov-2'/exp OR 'sars-cov-2' OR 'sarscov2' OR 'sars-cov2' OR '2019ncov' OR '2019-ncov'/exp OR '2019-ncov' OR '2019 coronavirus' OR '2019 corona virus' OR 'severe acute respiratory syndrome coronavirus 2'/exp OR 'severe acute



respiratory syndrome coronavirus 2' OR 'sars-coronavirus-2'/exp OR 'sars-coronavirus-2' OR 'coronavirus disease 2019'/exp OR 'coronavirus disease 2019' OR 'corona virus disease 2019')

AND

('obesity'/exp OR 'underweight'/exp OR 'body weight change'/exp OR 'body mass'/exp OR 'waist hip ratio'/exp OR obes\*:ti,ab,kw OR overweight\*:ti,ab,kw OR 'over weight\*':ti,ab,kw OR 'body mass index':ti,ab,kw OR 'body-mass index':ti,ab,kw OR 'waist hip ratio\*':ti,ab,kw OR 'waist-hip ratio\*':ti,ab,kw OR 'abdominal fat\*':ti,ab,kw OR 'underweight\*':ti,ab,kw OR 'body weight\*':ti,ab,kw)

AND

('mortality'/exp OR 'mortality' OR 'fatality'/exp OR 'fatal' OR 'fatality' OR 'fatalities' OR 'death' OR 'deaths')

Limit: English

### **Cochrane library:**

| Search number | Search                                                                                                                                                                                                                                                                                                                                                                                                                                                                                                                                                                        | Results |
|---------------|-------------------------------------------------------------------------------------------------------------------------------------------------------------------------------------------------------------------------------------------------------------------------------------------------------------------------------------------------------------------------------------------------------------------------------------------------------------------------------------------------------------------------------------------------------------------------------|---------|
| #1            | "COVID-19" OR "COVID 19" OR "COVID19" OR "COVID2019" OR "COVID 2019" OR "COVID-2019" OR "novel coronavirus" OR "new coronavirus" OR "novel corona virus" OR "new corona virus" OR "SARS-CoV-2" OR "SARSCoV2" OR "SARS-CoV2" OR "2019nCoV" OR "2019-nCoV" OR "2019 coronavirus" OR "2019 corona virus" OR "coronavirus disease 2019" OR "severe acute respiratory syndrome coronavirus 2" OR "severe acute respiratory syndrome coronavirus 2" OR "sars-coronavirus-2" OR "coronavirus disease 2019" OR "corona virus disease 2019" OR "betacoronavirus" OR "beta-coronavirus" | 1119    |
| #2            | MeSH descriptor: [Thinness] explode all trees                                                                                                                                                                                                                                                                                                                                                                                                                                                                                                                                 | 283     |
| #3            | MeSH descriptor: [Obesity] explode all trees                                                                                                                                                                                                                                                                                                                                                                                                                                                                                                                                  | 13544   |

|     |                                                                                                                                                                                    |           |
|-----|------------------------------------------------------------------------------------------------------------------------------------------------------------------------------------|-----------|
| #4  | MeSH descriptor: [Overweight] explode all trees                                                                                                                                    | 16074     |
| #5  | MeSH descriptor: [Body Weight Changes] explode all trees                                                                                                                           | 8578      |
| #6  | MeSH descriptor: [Body Mass Index] explode all trees                                                                                                                               | 9987      |
| #7  | MeSH descriptor: [Waist-Hip Ratio] explode all trees                                                                                                                               | 255       |
| #8  | "waist hip ratio" OR obes* OR overweight* OR "over weight" OR "body mass index" OR "body-mass index" OR "waist-hip ratio*" OR "abdominal fat*" OR "underweight*" OR "body weight*" | 102474    |
| #9  | #2 or #3 or #4 or #5 or #6 or #7 or #8                                                                                                                                             | 104326    |
| #10 | #1 and #9                                                                                                                                                                          | <b>35</b> |

### **Cochrane COVID-19 Study Register:**

|    | Search                       | Results    |
|----|------------------------------|------------|
| #1 | bmi OR obesi* OR overweight* | <b>388</b> |

### **Web of Science:**

TS=("waist hip ratio" OR obes\* OR overweight\* OR "over weight" OR "body mass index" OR "body-mass index" OR "waist-hip ratio" OR "abdominal fat" OR "underweight" OR "body weight")

AND

TS=("COVID-19" OR "COVID 19" OR "COVID19" OR "COVID2019" OR "COVID 2019" OR "COVID-2019" OR "novel coronavirus" OR "new coronavirus" OR "novel corona virus" OR "new corona virus" OR "SARS-CoV-2" OR "SARSCoV2" OR "SARS-CoV2" OR "2019nCoV" OR "2019-nCoV" OR "2019 coronavirus" OR "2019 corona virus" OR "coronavirus disease 2019" OR "severe acute respiratory syndrome coronavirus 2" OR "severe acute respiratory syndrome coronavirus 2" OR "sars-coronavirus-2" OR "coronavirus disease 2019" OR "corona virus disease 2019" OR "betacoronavirus" OR "beta-coronavirus")

AND

TS=("mortality" OR "fatal" OR "fatality" OR "fatalities" OR "death" OR "deaths") Timespan: All years. Indexes: SCI-EXPANDED, SSCI, A&HCI, CPCI-S, CPCI-SSH, BKCI-S, BKCI-SSH, ESCI, CCR-EXPANDED, IC.

Limit: English

**Scopus:**

TITLE-ABS-KEY ( "waist hip ratio" OR obes\* OR overweight\* OR "over weight" OR "body mass index" OR "body-mass index" OR "waist-hip ratio" OR "abdominal fat" OR "underweight" OR "body weight" )

AND

TITLE-ABS-KEY ( "COVID-19" OR "COVID 19" OR "COVID19" OR "COVID2019" OR "COVID 2019" OR "COVID-2019" OR "novel coronavirus" OR "new coronavirus" OR "novel corona virus" OR "new corona virus" OR "SARS-CoV-2" OR "SARSCoV2" OR "SARS-CoV2" OR "2019nCoV" OR "2019-nCoV" OR "2019 coronavirus" OR "2019 corona virus" OR "coronavirus disease 2019" OR "severe acute respiratory syndrome coronavirus 2" OR "severe acute respiratory syndrome coronavirus 2" OR "sars-coronavirus-2" OR "coronavirus disease 2019" OR "corona virus disease 2019" OR "betacoronavirus" OR "beta-coronavirus" )

AND

TITLE-ABS-KEY ("mortality" OR "fatal" OR "fatality" OR "fatalities" OR "death" OR "deaths")

Limit: English
